# Supplementary material
Source: PubMed Central journal article supplement (PMC5591034)
Supplement: NIHMS852727-supplement-Supp_info.pdf [file NIHMS852727-supplement-Supp_info.pdf]

### ChronotypeMSFsc

### ChronotypeDLMO

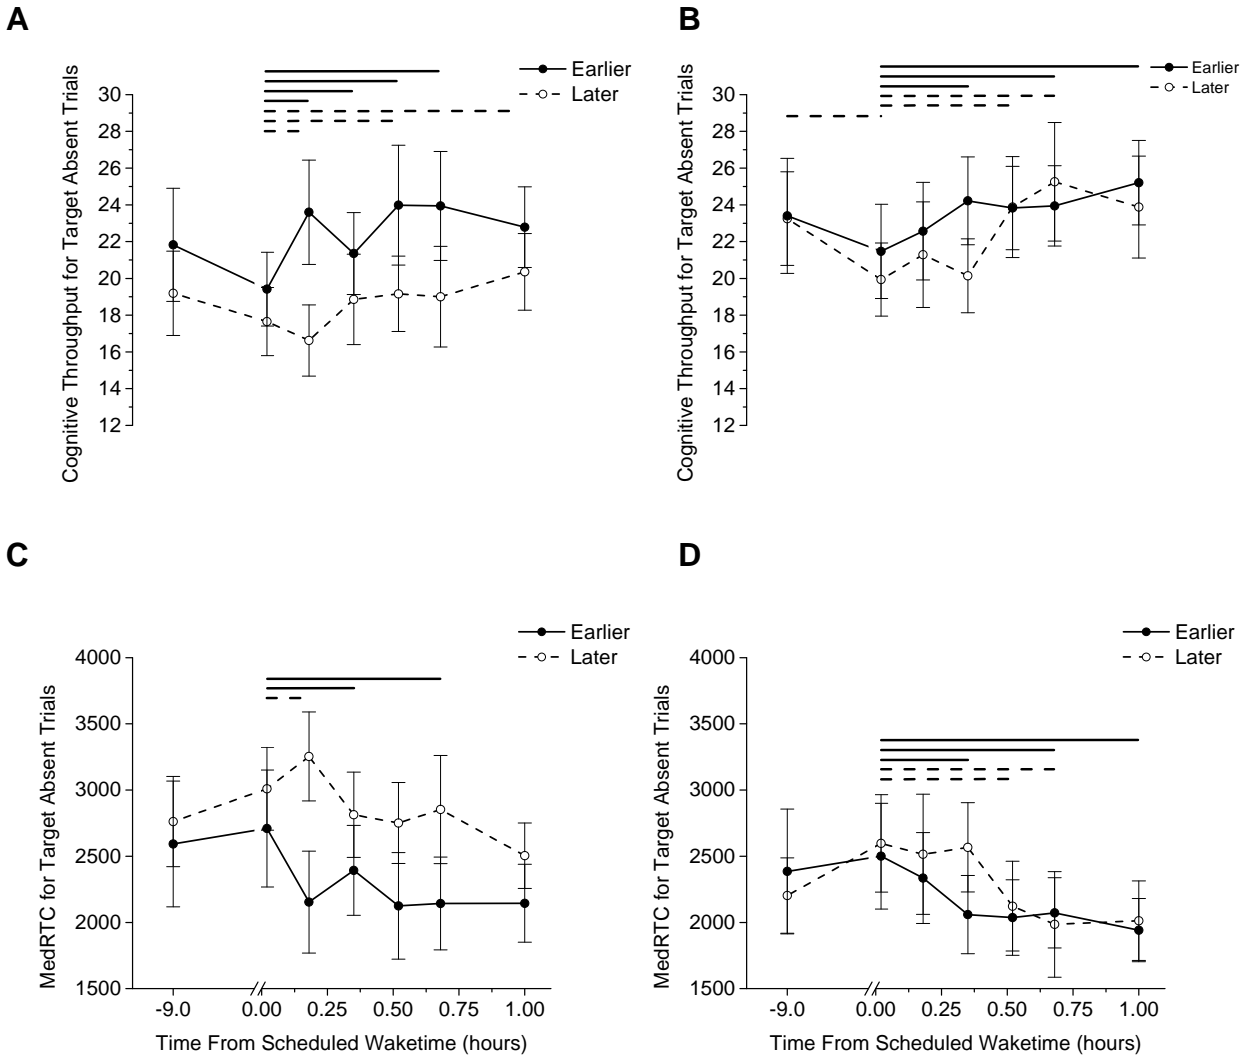

**Figure S1.** Cognitive performance on the visual search task for the chronotypeMSFsc group (A and C) and chronotypeDLMO group (B and D). A and B represent cognitive throughput for correct responses on target absent trials; C and D represent median reaction time for correct responses on target absent trials. Solid and dashed lines represent significant differences ( $p < 0.05$ ) for time points at the ends of each line within the earlier and later chronotype groups, respectively.

**Table S1.** Sleep architecture for all subjects and comparing earlier and later chronotypes

|                                                 | All Subjects<br>(n=17) | ChronotypeMSFsc  |                | ChronotypeDLMO   |                |
|-------------------------------------------------|------------------------|------------------|----------------|------------------|----------------|
|                                                 |                        | Earlier<br>(n=6) | Later<br>(n=7) | Earlier<br>(n=7) | Later<br>(n=6) |
| Percentage of recording time                    |                        |                  |                |                  |                |
| <b>Stage 1</b>                                  | 5.7 ± 0.6              | 6.5 ± 1.1        | 6.1 ± 1.0      | 6.3 ± 0.9        | 4.9 ± 0.0      |
| <b>Stage 2</b>                                  | 50.4 ± 1.6             | 51.1 ± 1.7       | 48.8 ± 3.3     | 51.6 ± 1.2       | 49.6 ± 2.1     |
| <b>SWS</b>                                      | 18.2 ± 1.4             | 18.1 ± 1.1       | 16.7 ± 2.9     | 16.8 ± 0.9       | 19.9 ± 2.6     |
| <b>REM</b>                                      | 20.2 ± 1.1             | 18.3 ± 1.4       | 22.8 ± 2.0     | 19.4 ± 1.6       | 19.8 ± 2.3     |
| <b>SE</b>                                       | 94.4 ± 0.8             | 94.0 ± 1.7       | 94.4 ± 1.3     | 94.2 ± 1.2       | 94.3 ± 1.9     |
| Minutes of recording time                       |                        |                  |                |                  |                |
| <b>Stage 1</b>                                  | 27.2 ± 3.0             | 31.0 ± 5.3       | 29.2 ± 5.0     | 30.4 ± 4.1       | 23.7 ± 5.5     |
| <b>Stage 2</b>                                  | 241.3 ± 7.8            | 244.8 ± 8.7      | 233.6 ± 15.6   | 247.4 ± 5.7      | 238.2 ± 10.0   |
| <b>SW</b>                                       | 87.1 ± 6.9             | 86.3 ± 4.9       | 80.2 ± 13.8    | 80.6 ± 4.1       | 95.3 ± 12.7    |
| <b>REM</b>                                      | 96.7 ± 5.5             | 87.6 ± 6.7       | 109.4 ± 9.9    | 93.3 ± 7.5       | 95.2 ± 11.1    |
| <b>WASO</b>                                     | 26.8 ± 3.8             | 28.8 ± 8.1       | 26.7 ± 6.2     | 27.8 ± 5.9       | 27.6 ± 9.1     |
| <b>TST</b>                                      | 452.3 ± 3.9            | 449.8 ± 8.1      | 452.4 ± 6.5    | 451.6 ± 6.2      | 452.3 ± 9.0    |
| <b>SOL</b>                                      | 5.7 ± 1.4              | 7.0 ± 4.0        | 4.6 ± 1.1      | 7.2 ± 3.3        | 4.3 ± 1.3      |
| <b>Wake in last 10 min<br/>of sleep episode</b> | 0.4 ± 0.2              | 0.7 ± 0.4        | 0.4 ± 0.3      | 0.4 ± 0.9        | 0.3 ± 0.3      |
| <b>Wake in last 30 min<br/>of sleep episode</b> | 2.0 ± 0.7              | 2.0 ± 0.6        | 1.0 ± 0.6      | 2.8 ± 1.5        | 1.3 ± 0.7      |

Data represent mean±SEM; errors are standard error of the mean. Percentages sum to over 100% due to rounding.

**Table S2.** Sleep stage upon awakening

|                      | <b>Stage 1</b> | <b>Stage 2</b> | <b>Stage 3</b> | <b>REM</b> | <b>Wake</b> |
|----------------------|----------------|----------------|----------------|------------|-------------|
| All Subjects (n=17)* |                |                |                |            |             |
|                      | 1              | 8              | 2              | 3          | 3           |
| Chronotype MSFsc     |                |                |                |            |             |
| <b>Earlier</b> (n=6) | 1              | 2              | 0              | 2          | 1           |
| <b>Later</b> (n=7)   | 0              | 3              | 1              | 1          | 2           |
| Chronotype DLMO      |                |                |                |            |             |
| <b>Earlier</b> (n=7) | 0              | 4              | 0              | 1          | 2           |
| <b>Later</b> (n=6)   | 0              | 2              | 1              | 2          | 1           |

\*missing data for one subject
